# Supplementary material for: Ancient DNA from latrines in Northern Europe and the Middle East (500 BC–1700 AD) reveals past parasites and diet
Source: PLoS One. 2018 Apr 25;13(4):e0195481. doi: 10.1371/journal.pone.0195481 (PMC5918799; doi:10.1371/journal.pone.0195481)
Supplement: S6 Table — (XLSX) [file pone.0195481.s007.xlsx]

## Sheet: ST6 - Plastid
S6 Table. Sequencing read assignment using plastid database
Taxon	Genus	Species	BR_518cv	JD_JR	DK_VI_Bot198	DK_VI_Zoo286	DK_OD_991	DK_OD_937	DK_KT	DK_AG	DK_GS_GSA	DK_GS_GSB	NL_Kampen_sn759	NL_Kampen_sn4044	NL_Zwolle_Bit14	LT_VLN5	Extraction control 1	Extraction control 2	Extraction control 3	Extraction control 4	Max
Vitis	x		0	0	0	4	3	1	10	0	38	28	83	53	7101	5	0	0	0	0	7101
Vitis_vinifera		x	0	0	0	2	0	0	8	0	25	10	24	20	2884	0	0	0	0	0	2884
Humulus_lupulus		x	1	0	2	4	293	273	26	2	688	2830	7	0	4	10	0	0	1	0	2830
Prunus	x		2	0	10	25	216	184	6	281	84	65	31	19	42	1428	0	0	0	0	1428
Pyrus	x		10	0	32	75	237	88	58	293	827	385	291	150	551	41	0	0	1	0	827
Pisum_sativum		x	1	0	725	269	55	49	93	382	196	29	329	79	187	19	2	0	0	0	725
Nicotiana	x		0	0	0	0	0	0	0	16	560	50	0	0	0	0	0	0	0	0	560
Fagopyrum_esculentum_subsp._ancestrale			0	0	2	2	4	4	92	482	37	38	2	6	30	169	0	0	0	0	482
Fagopyrum	x		1	0	5	3	4	6	80	367	49	57	3	5	26	134	0	0	0	0	367
Fragaria	x		2	0	7	65	61	28	0	2	81	349	11	1	5	134	0	0	1	0	349
Brassica	x		1	1	2	6	69	5	2	16	51	56	208	22	8	7	0	0	1	0	208
Lathyrus	x		3	0	39	161	19	21	3	4	51	109	10	6	15	29	0	0	0	0	161
Rheum_palmatum		x	0	0	9	17	11	18	0	10	72	161	16	9	9	65	0	0	0	0	161
Lupinus_luteus		x	2	0	55	132	0	0	0	0	1	8	1	0	0	0	0	0	0	0	132
Vitis_rotundifolia		x	0	0	0	0	0	0	0	0	4	0	2	0	129	1	0	0	0	0	129
Pyrus_spinosa		x	1	0	2	6	29	10	6	43	110	43	17	15	68	2	0	0	0	0	110
Lotus_japonicus		x	0	0	24	97	4	13	0	0	36	89	1	3	2	2	0	0	0	0	97
Vaccinium_macrocarpon		x	0	0	28	89	31	14	5	2	25	53	16	4	12	40	0	0	0	0	89
Hordeum_vulgare_subsp._vulgare		x	0	0	0	13	5	3	0	1	13	68	0	0	0	0	0	0	0	0	68
Hordeum	x		0	0	2	10	1	2	0	2	3	63	0	3	0	1	0	0	1	0	63
Prunus_maximowiczii		x	0	0	0	0	1	0	0	18	2	0	0	0	0	62	0	0	0	0	62
